# Supplementary material for: A lysosome-targeted fluorescent probe based on a BODIPY structure for Cys/Hcy detection
Source: Royal Society of Chemistry journal article supplement (doi:10.1039/d3ay01965a), 2023-12-27
Supplement: d3ay01965a1.pdf [file d3ay01965a1.pdf]

## Supporting Information

### **A lysosome-targeted fluorescent probe based on BODIPY structure for Cys/Hcy detection**

*Wenxuan Zhang<sup>a,1</sup>, Binbin Wu<sup>a,1</sup>, Manshan Liang<sup>a</sup>, Mengpei Zhang<sup>b</sup>, Yutao Hu<sup>b</sup>, Zusheng Huang<sup>a</sup>, Xiaoxia Ye<sup>a</sup>, Bing Du<sup>c,\*</sup>, Yun-Yun Quan<sup>a,\*</sup>, Yongsheng Jiang<sup>b,\*</sup>*

<sup>a</sup> School of Pharmaceutical Sciences, Wenzhou Medical University, Wenzhou 325035, China.

<sup>b</sup> The Affiliated Xiangshan Hospital of Wenzhou Medical University: Xiangshan First People's Hospital Medical and Health Group, Xiangshan, 315700, China.

<sup>c</sup> The Second Affiliated Hospital and Yuying Children's Hospital of Wenzhou Medical University, Wenzhou 325027, China.

<sup>1</sup> Those authors contributed equally to this work.

E-mail: shenren34127@163.com (Y. Jiang), yunyunquan@163.com (Y.-Y. Quan), 443723729@qq.com (B. Du).

† Electronic supplementary information (ESI) available. See DOI: <https://doi.org/10.1039/xxxx>

### Synthesis of 4-bromo-N, N-bis (4-(2-morpholinoethoxy) phenyl) aniline (2)

The started compound **1** (500 mg, 1.41 mmol), 4-(2-chloroethyl)morpholine (577 mg, 3.10 mmol), Cs<sub>2</sub>CO<sub>3</sub> (2.74g, 8.41 mmol) and KI (50 mg, 0.28 mmol) were dissolved in anhydrous acetonitrile (15 mL). The reaction mixture was stirred and refluxed for 12 h under the protection of Ar at 105 °C. After the reaction was completed, the organic solvent was removed under reduced pressure, and the residue was separated by column chromatography (eluent: DCM/MeOH = 40/1, v/v). The desired product **2** (350 mg) was achieved as yellowish oily liquid. Yield: 43%. <sup>1</sup>H NMR (400 MHz, CDCl<sub>3</sub>) δ 7.24 (d, J = 8.9 Hz, 2H), 7.00 (d, J = 8.9 Hz, 4H), 6.80 (dd, J = 11.2, 8.9 Hz, 6H), 4.13 (t, J = 5.2 Hz, 4H), 3.82 – 3.74 (m, 8H), 2.87 (s, 4H), 2.67 (s, 8H). <sup>13</sup>C NMR (100 MHz, CDCl<sub>3</sub>) δ 154.59, 147.69, 141.03, 131.86, 126.45, 122.41, 115.52, 112.78, 65.91, 65.01, 57.26, 53.58. HRMS (ESI): Calculated for C<sub>30</sub>H<sub>37</sub>BrN<sub>3</sub>O<sub>4</sub> [M+H]<sup>+</sup>: 582.1967, found: 582.1964.

### Synthesis of 4-(2-morpholinoethoxy)-N-(4-(2-morpholinoethoxy) phenyl)-N-(4-(4,4,5,5-tetramethyl-1,3,2-dioxaborolan-2-yl)phenyl)aniline (3)

Compound **2** (450 mg, 0.78 mmol), boronate (406 mg, 1.60 mmol), potassium acetate (230 mg, 2.34 mmol) and Pd(dppf)<sub>2</sub>Cl<sub>2</sub> (57 mg, 0.078 mmol) were dissolved in 1,4-Dioxane (15 mL). The mixture was stirred and refluxed for 12 h under the protection of Ar at 100 °C. The mixture derived from the reaction was separated by column chromatography (eluent: DCM/MeOH = 30/1, v/v), the desired product **3** (350 mg) was obtained as white oily liquid. Yield: 62%. <sup>1</sup>H NMR (400 MHz, CDCl<sub>3</sub>) δ 7.59 (d, J = 8.5 Hz, 2H), 7.03 (d, J = 8.9 Hz, 4H), 6.86 (d, J = 8.5 Hz, 2H), 6.82 (d, J = 8.9 Hz, 4H), 4.08 (t, J = 5.7 Hz, 4H), 3.75 – 3.71 (m, 8H), 2.79 (t, J = 5.6 Hz, 4H), 2.59 – 2.55 (m, 8H), 1.31 (s, 12H). <sup>13</sup>C NMR (100 MHz, MeOD-*d*<sub>4</sub>) δ 155.57, 151.47, 140.41, 135.47, 127.07, 126.01, 117.94, 115.26, 66.22, 65.31, 57.38, 53.75, 23.89. HRMS (ESI): Calculated for C<sub>36</sub>H<sub>49</sub>BN<sub>3</sub>O<sub>6</sub> [M+H]<sup>+</sup>: 630.3714, found: 630.3715.

### Synthesis of B-T-OH

BODIPY-OH (238 mg, 0.48 mmol), compound **3** (300 mg, 0.48 mmol), Pd(PPh<sub>3</sub>)<sub>4</sub> (50 mg, 0.043 mmol) and K<sub>2</sub>CO<sub>3</sub> aqueous solution (2 M, 1.44 mL) were dissolved in toluene (20 mL). The reaction mixture was stirred and refluxed for 12 h under the

protection of Ar at 100 °C. The mixture derived from the reaction was separated by column chromatography (eluent: DCM/MeOH = 40/1, v/v) and the product B-T-OH (66 mg) was obtained as a violet solid. Yield: 15%, M. p. = 134–136 °C. <sup>1</sup>H NMR (400 MHz, CDCl<sub>3</sub>) δ 7.10 (d, J = 8.5 Hz, 2H), 7.02 (d, J = 8.9 Hz, 4H), 6.94 (d, J = 8.5 Hz, 2H), 6.87 (s, 4H), 6.81 (d, J = 9.0 Hz, 4H), 4.13 (t, J = 5.3 Hz, 4H), 3.80 – 3.76 (m, 8H), 2.89 (s, 4H), 2.69 (s, 8H), 2.59 (s, 3H), 2.52 (s, 3H), 1.43 (s, 3H), 1.37 (s, 3H). <sup>13</sup>C NMR (100 MHz, CDCl<sub>3</sub>) δ 157.34, 154.94, 150.87, 147.76, 142.12, 141.05, 140.88, 138.49, 134.59, 132.32, 130.65, 130.49, 129.43, 126.82, 126.50, 124.83, 119.96, 116.58, 115.50, 110.53, 77.48, 77.16, 76.84, 66.59, 65.60, 57.76, 54.07, 14.26, 13.79, 13.57, 13.44. HRMS (ESI): Calculated for C<sub>49</sub>H<sub>54</sub>BBrF<sub>2</sub>N<sub>5</sub>O<sub>5</sub> [M+H]<sup>+</sup>: 920.3369, found: 920.3379.

### Synthesis of NBD-B-T

B-T-OH (42 mg, 0.046 mmol), NBD-Cl (10 mg, 0.05 mmol) and Et<sub>3</sub>N (0.1 mL) were dissolved in anhydrous dichloromethane (10 mL). The reaction mixture was stirred and refluxed for 6 h under the protection of Ar. After the solvent was removed under reduced pressure, the residue product was separated by column chromatography (eluent: DCM/MeOH = 40/1, v/v). The target product NBD-B-T (15 mg) was obtained as violet solid. Yield: 30%, M. p. = 135–137 °C. <sup>1</sup>H NMR (400 MHz, CDCl<sub>3</sub>) δ 8.49 (d, J = 8.3 Hz, 1H), 7.51 (d, J = 8.4 Hz, 2H), 7.43 (d, J = 8.4 Hz, 2H), 7.07 (d, J = 8.8 Hz, 4H), 6.92 (s, 4H), 6.85 (d, J = 8.8 Hz, 4H), 6.61 (d, J = 8.3 Hz, 1H), 4.13 (s, 4H), 3.77 (s, 8H), 2.85 (s, 4H), 2.62 (d, J = 4.0 Hz, 11H), 2.56 (s, 3H), 1.50 (s, 3H), 1.44 (s, 3H). <sup>13</sup>C NMR (100 MHz, CDCl<sub>3</sub>) δ 158.47, 155.25, 153.77, 153.36, 151.62, 148.09, 145.10, 144.21, 140.72, 140.11, 139.32, 137.76, 135.29, 134.14, 133.05, 131.81, 131.30, 130.89, 130.49, 129.73, 126.92, 123.96, 121.96, 119.59, 115.51, 110.93, 108.44, 66.90, 66.01, 57.72, 54.10, 41.05, 13.83, 13.57, 13.40. HRMS (ESI): Calculated for C<sub>55</sub>H<sub>55</sub>BBrF<sub>2</sub>N<sub>8</sub>O<sub>8</sub> [M+H]<sup>+</sup>: 1083.3387, found: 1083.3383.

**Table S1** Comparison of probe NBD-B-T with reported Cys/Hcy probes.

| Cys/Hcy probe                                                                       | Response type | Reaction Time              | LOD                                      | $\lambda_{em}/nm$ | Organelle targeting | Ref       |
|-------------------------------------------------------------------------------------|---------------|----------------------------|------------------------------------------|-------------------|---------------------|-----------|
| 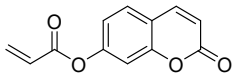   | turn on       | Hcy: 8 h<br>Cys: 60 min    | Hcy: 79 nM<br>Cys: 65 nM                 | 455 nm            | none                | [1]       |
|    | turn on       | Hcy: 20 min<br>Cys: 20 min | Hcy: 3.46 $\mu$ M<br>Cys: 1.92 $\mu$ M   | 625 nm            | none                | [2]       |
|    | turn off      | Cys: 90 min                | Cys: 1.97 $\mu$ M                        | 531 nm            | none                | [3]       |
|    | turn on       | Hcy: 80 min                | Hcy: 9.02 $\mu$ M                        | 468 nm            | none                | [4]       |
|    | turn on       | Hcy: 6 min<br>Cys: 10 s    | Hcy: 2.81 $\mu$ M<br>Cys: 2.33 $\mu$ M   | 592 nm            | none                | [5]       |
|  | ratiometric   | Hcy: 30 min<br>Cys: 30 min | Hcy: 0.554 $\mu$ M<br>Cys: 1.816 $\mu$ M | 452 nm<br>558 nm  | none                | [6]       |
|  | turn on       | Cys: 5 min                 | Cys: 0.16 $\mu$ M                        | 510 nm            | lysosome            | [7]       |
|  | turn on       | Hcy: 20 min<br>Cys: 60 min | Hcy: 76.0 nM<br>Cys: 97.6 nM             | 550 nm            | lysosome            | This work |

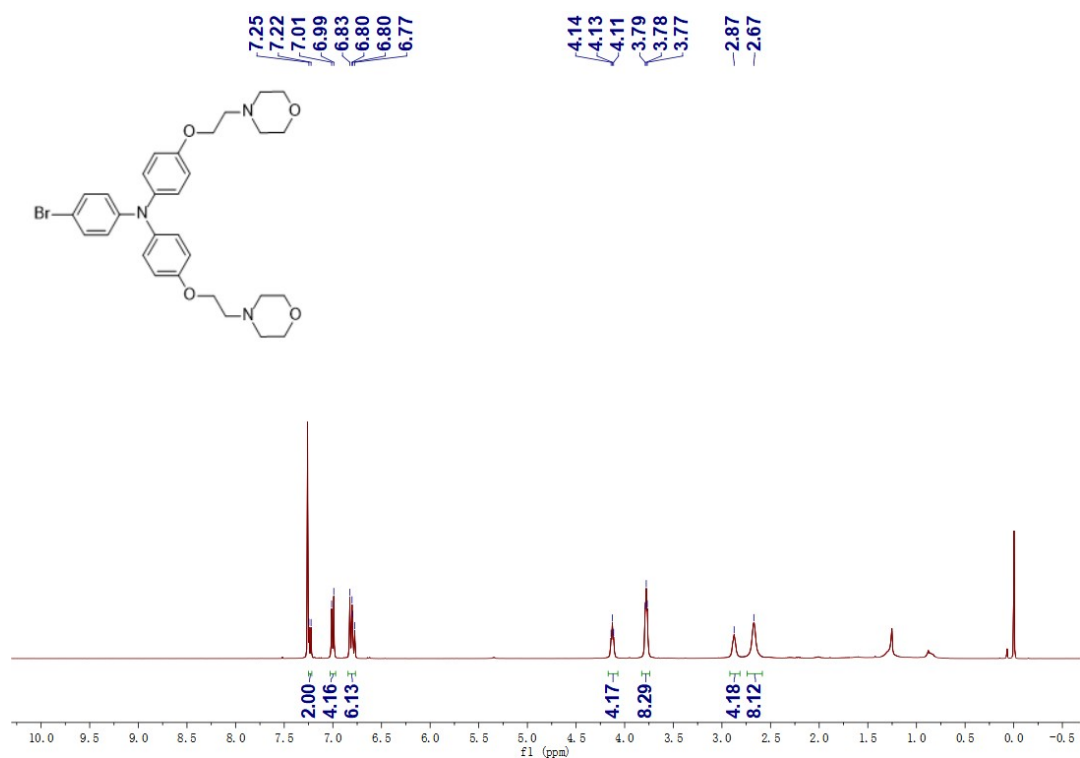

Fig. S1. <sup>1</sup>H NMR of compound 2.

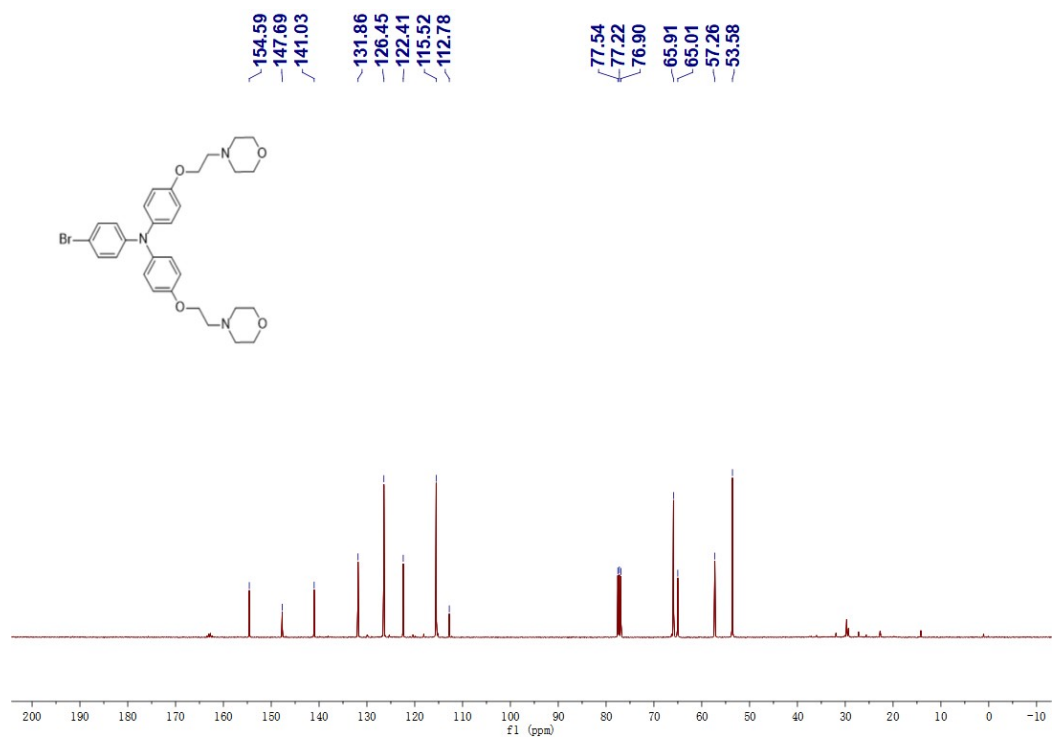

Fig. S2. <sup>13</sup>C NMR of compound 2.

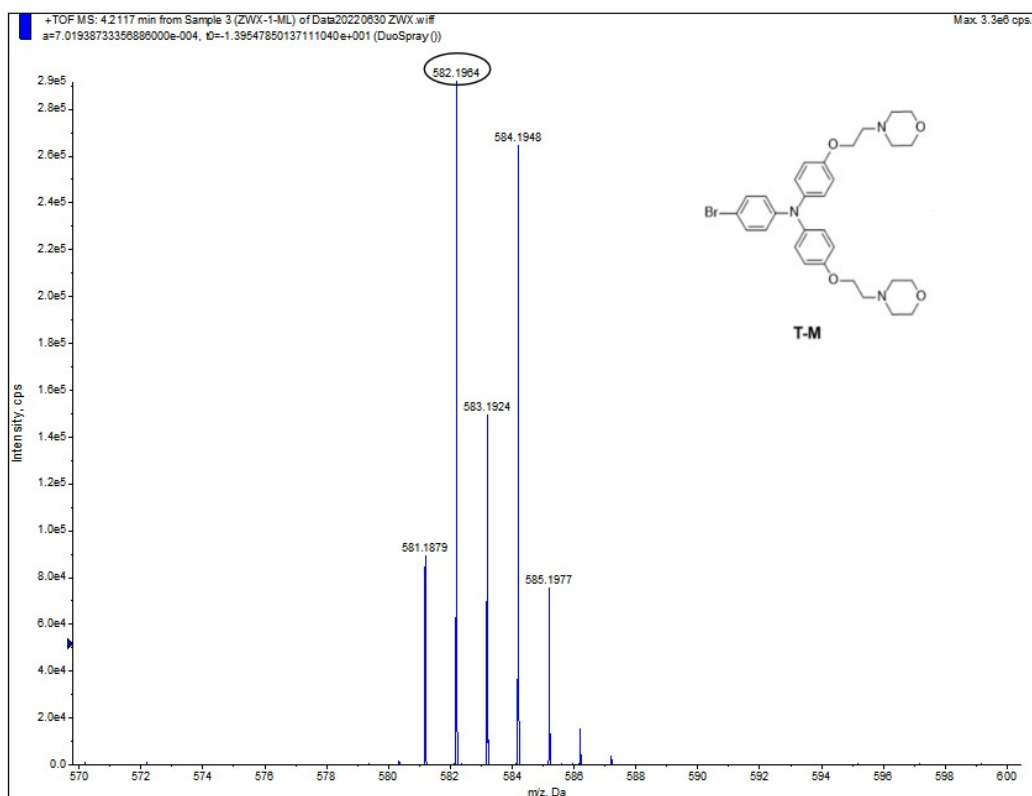

Fig. S3. HR-MS spectrum of compound 2.

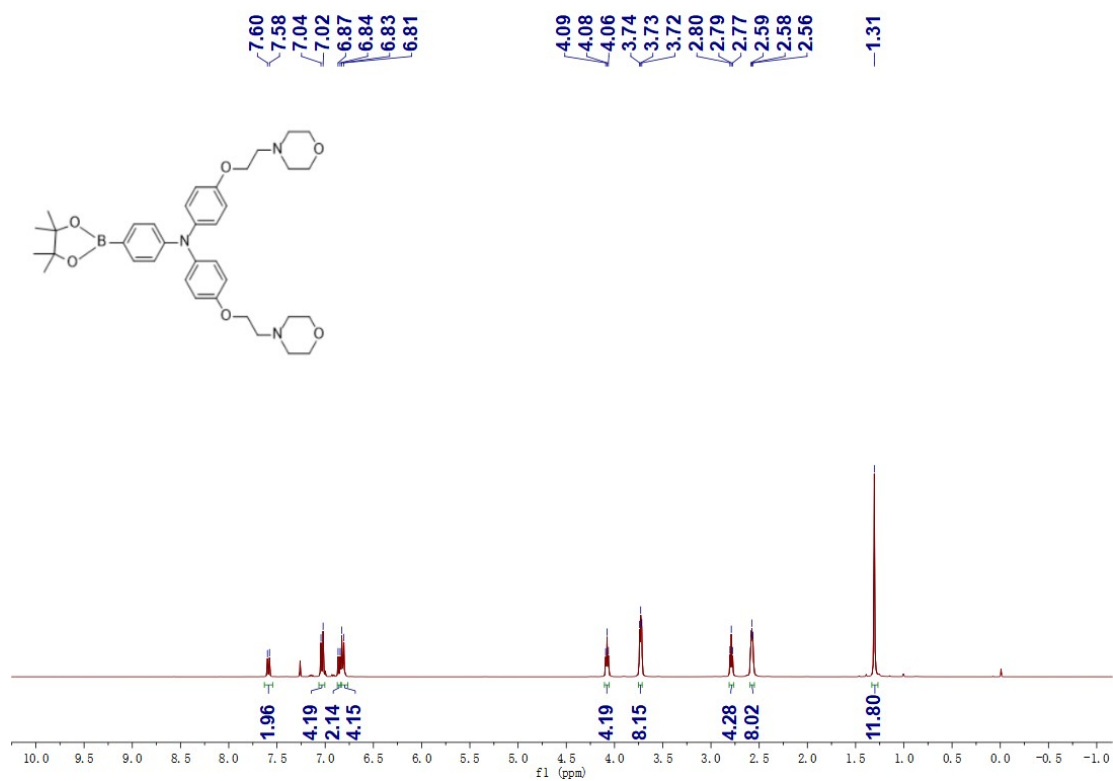

Fig. S4. <sup>1</sup>H NMR of compound 3.

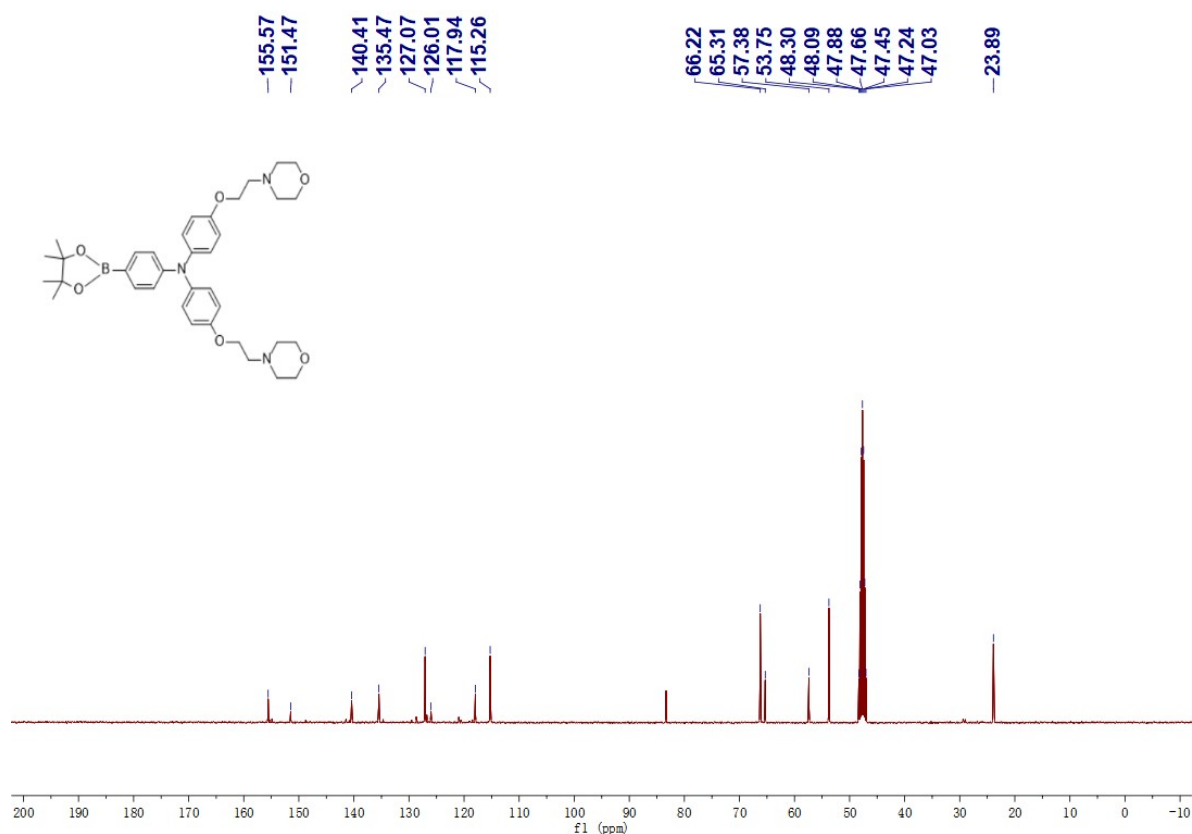

Fig. S5. <sup>13</sup>C NMR of compound 3.

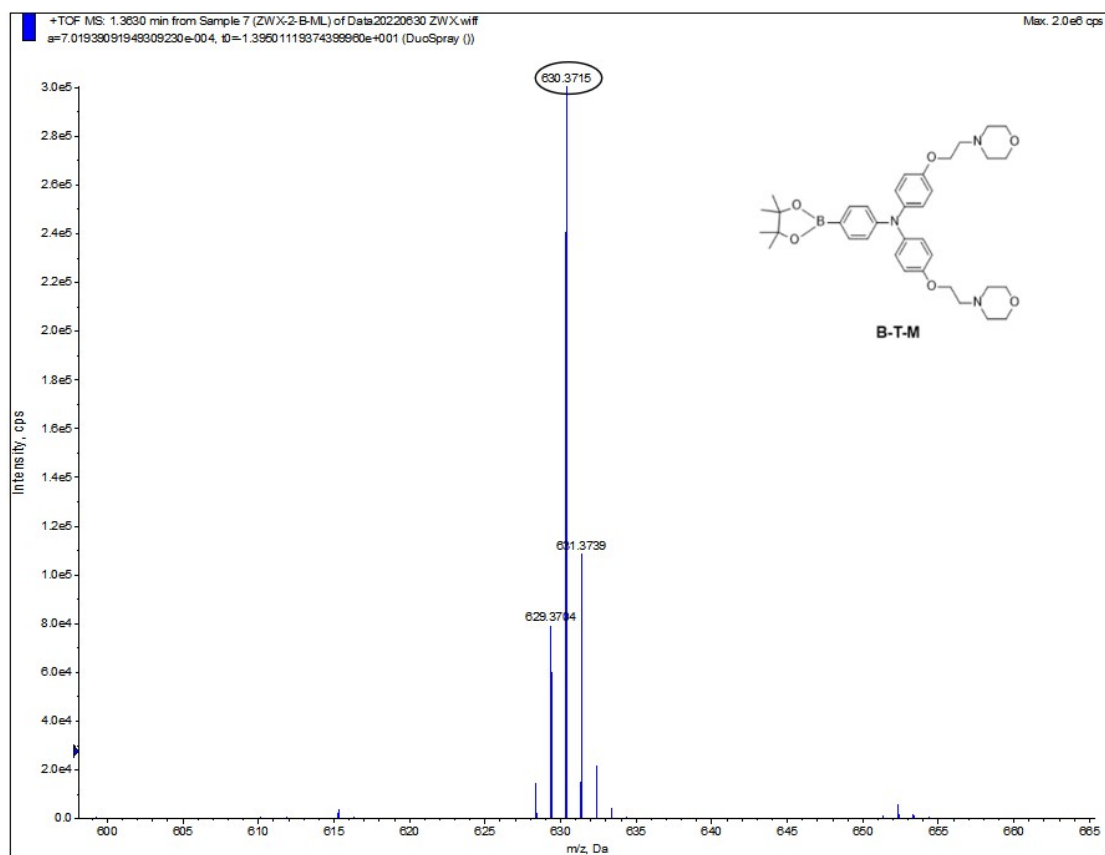

Fig. S6. HR-MS spectrum of compound 3.

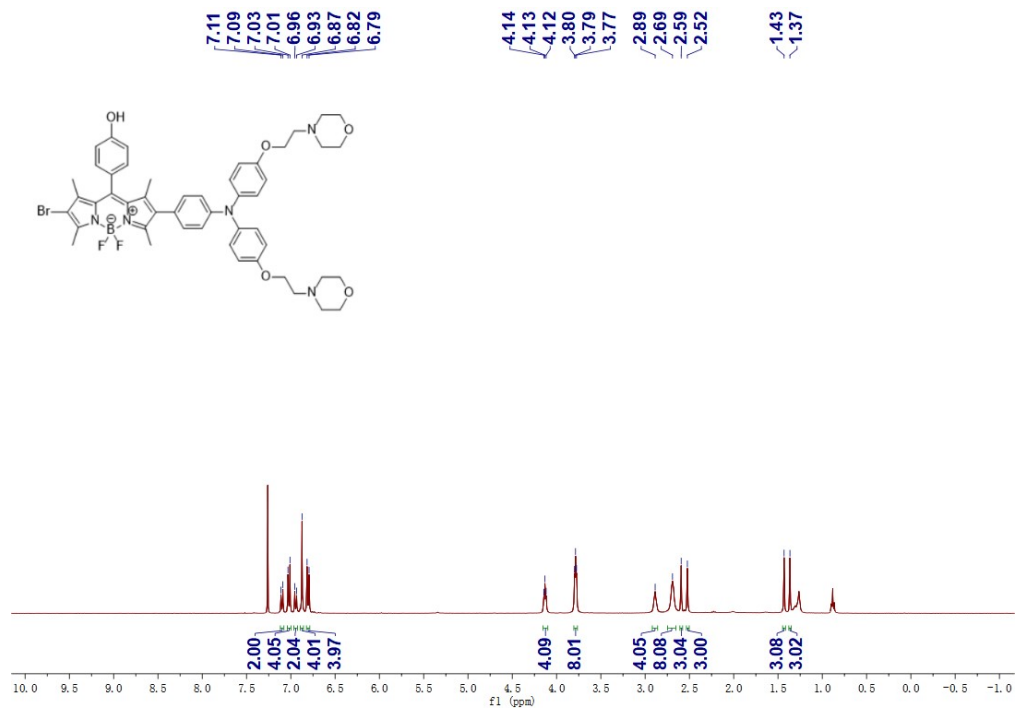

**Fig. S7.** <sup>1</sup>H NMR of compound B-T-OH.

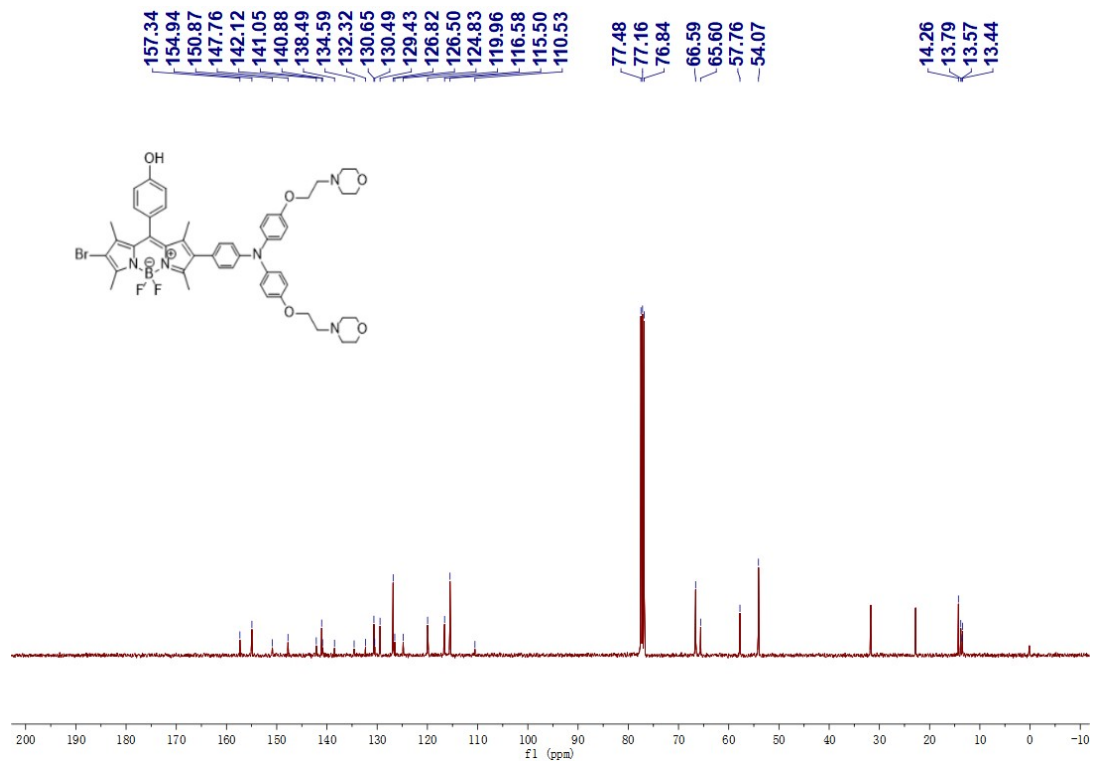

**Fig. S8.** <sup>13</sup>C NMR of compound B-T-OH.



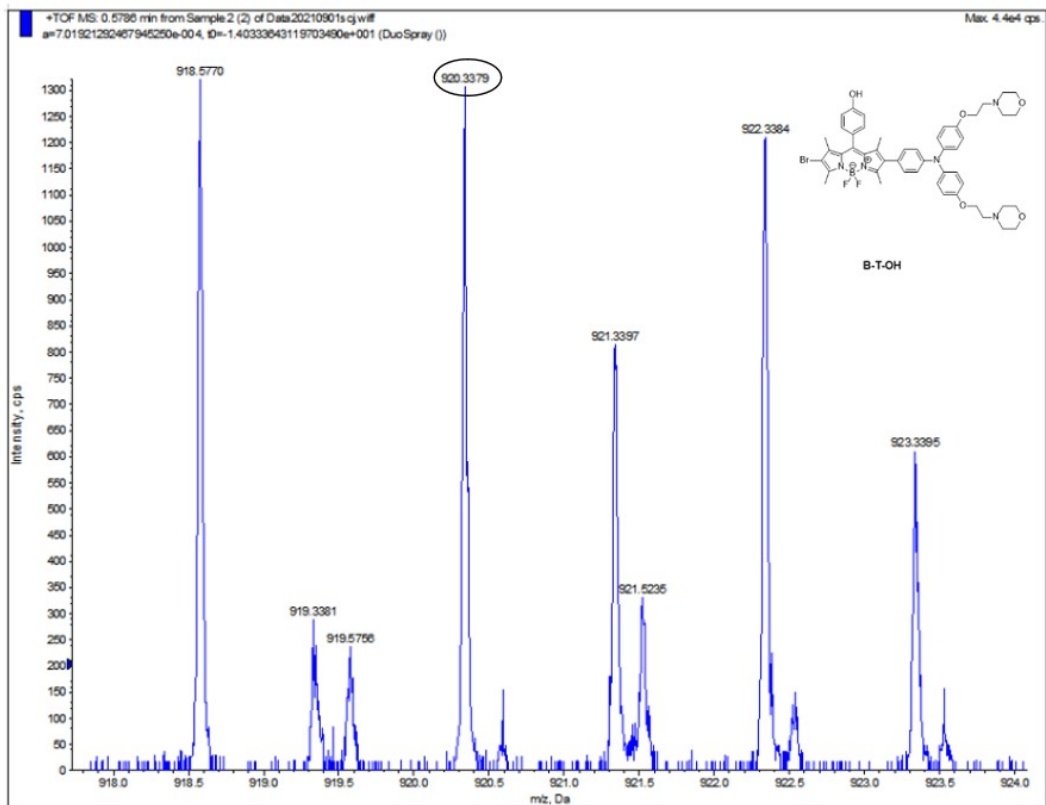

Fig. S9. HR-MS spectrum of compound B-T-OH.

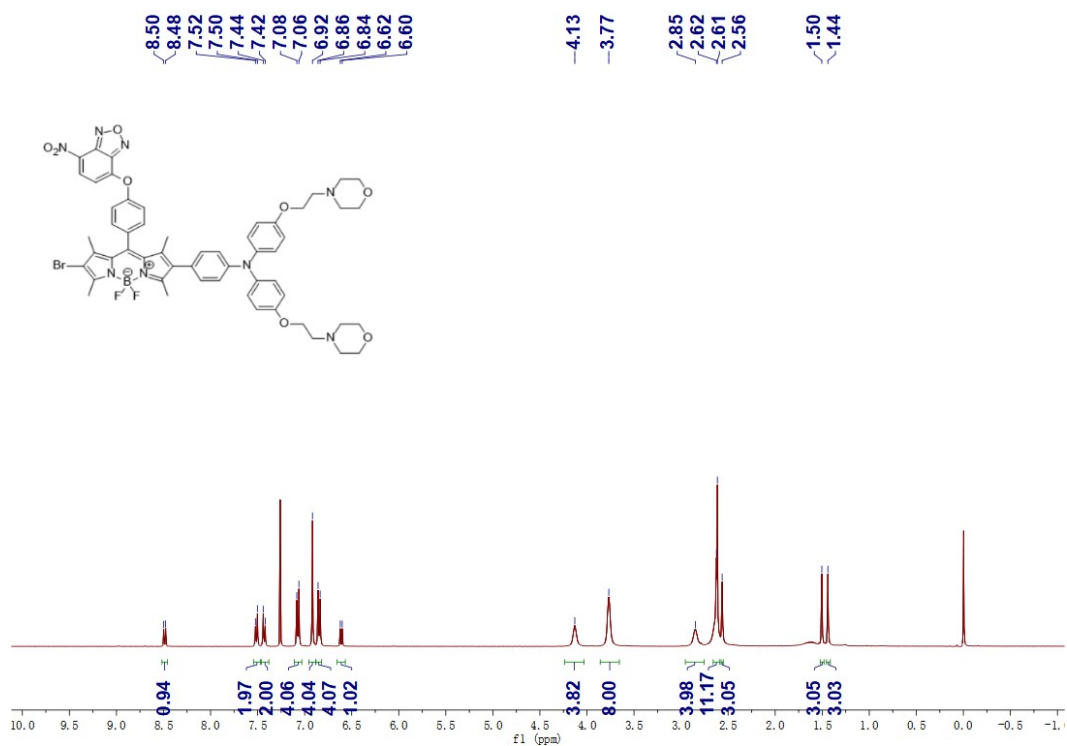

Fig. S10. <sup>1</sup>H NMR of compound NBD-B-T.

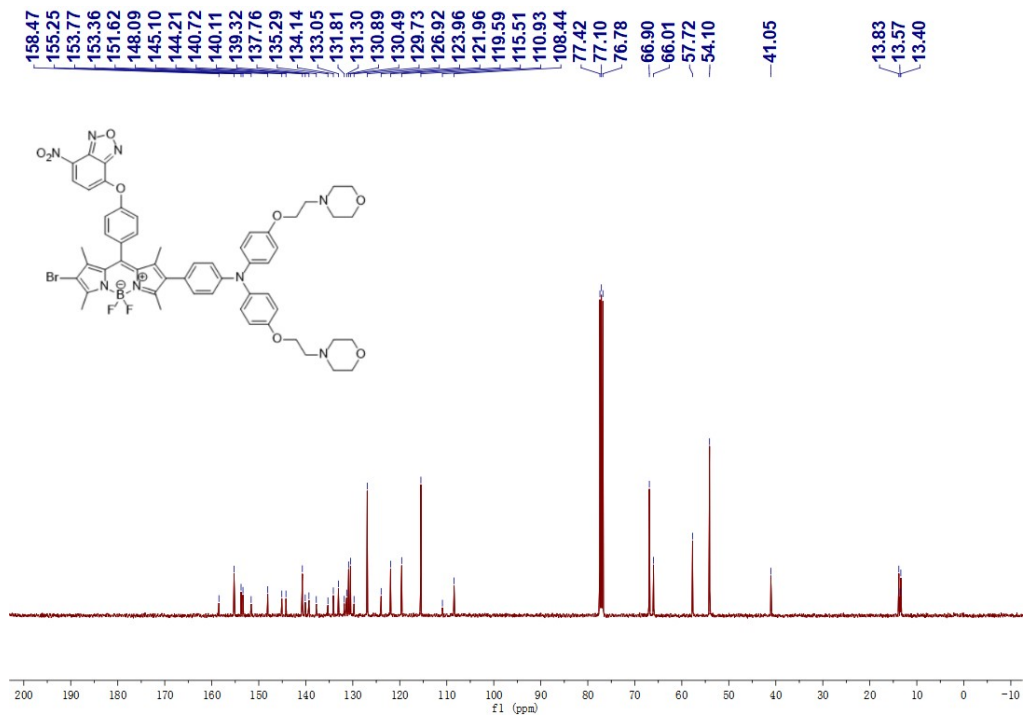

**Fig. S11.** <sup>13</sup>C NMR of compound NBD-B-T.

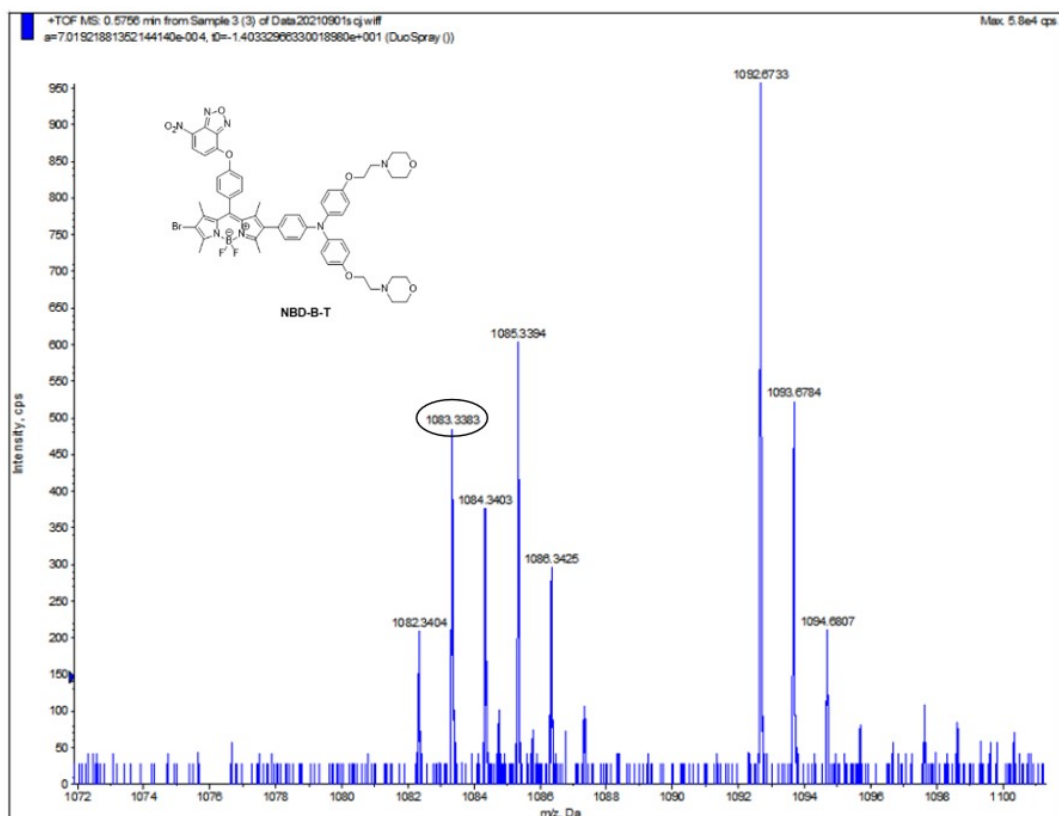

**Fig. S12.** HR-MS spectrum of compound NBD-B-T.

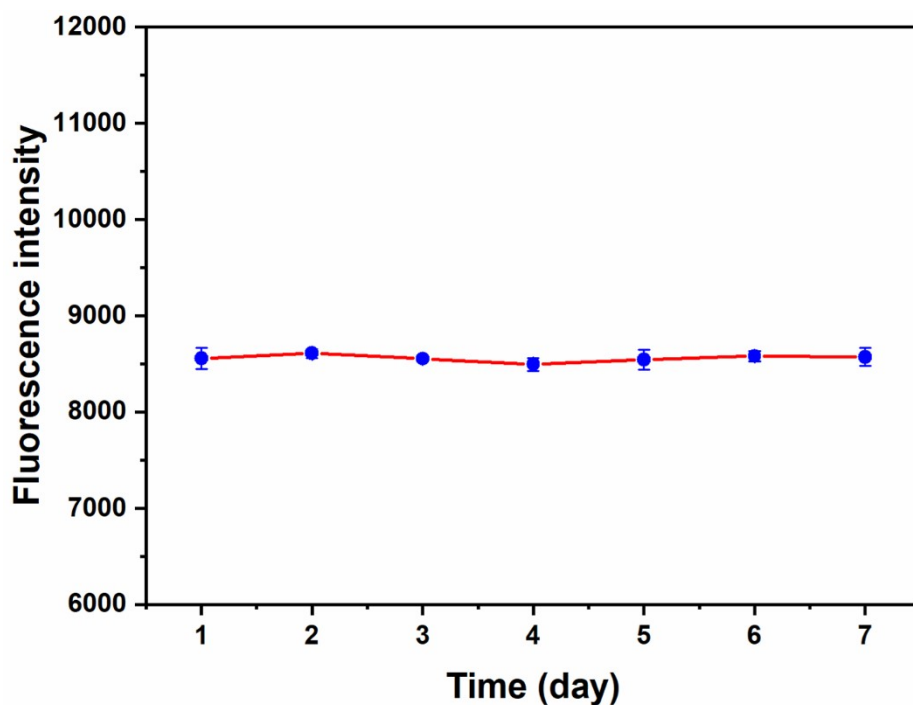

Fig. S13. Fluorescence intensity of NBD-B-T for seven days.

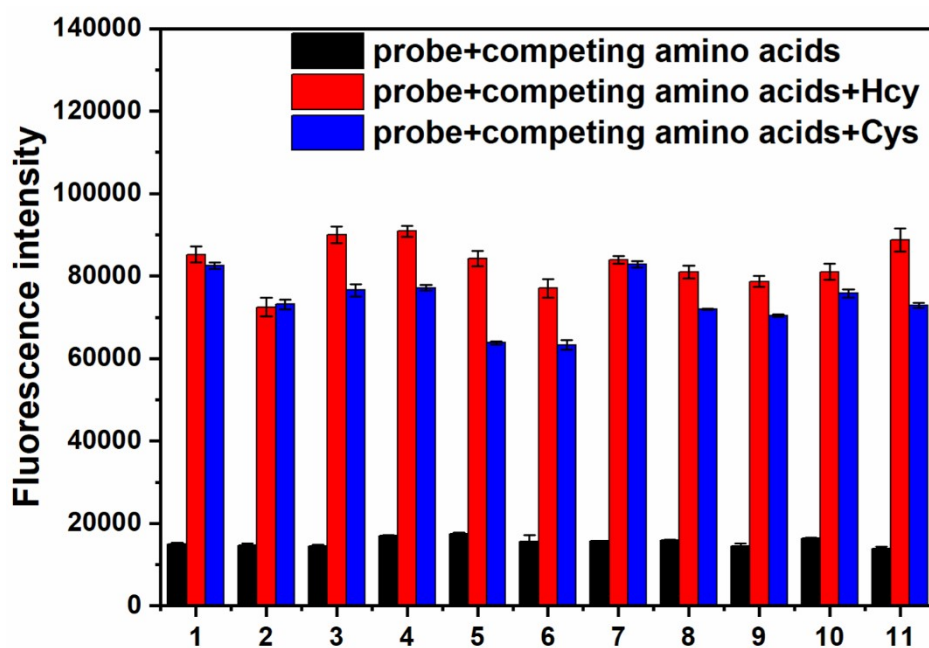

Fig. S14. The fluorescence response of NBD-B-T (10  $\mu\text{M}$ ) toward Cys (blue) and Hcy (red) and various analytes (500  $\mu\text{M}$ ) in DMF/PBS (v/v = 1/1, pH = 7.4).  $\lambda_{\text{ex}}$  = 365 nm. Black bars represent the solution of NBD-B-T (10  $\mu\text{M}$ ) in the presence of various analytes (500  $\mu\text{M}$ ). Red bars, blue bars represent the addition of Hcy and Cys (500  $\mu\text{M}$ ) to the above solution, respectively. Analytes: 1. Glu, 2. His, 3. Leu, 4. Met, 5. Phe, 6. Pro, 7. Ser, 8. Thr, 9. Val, 10. Gly, 11. Sar.

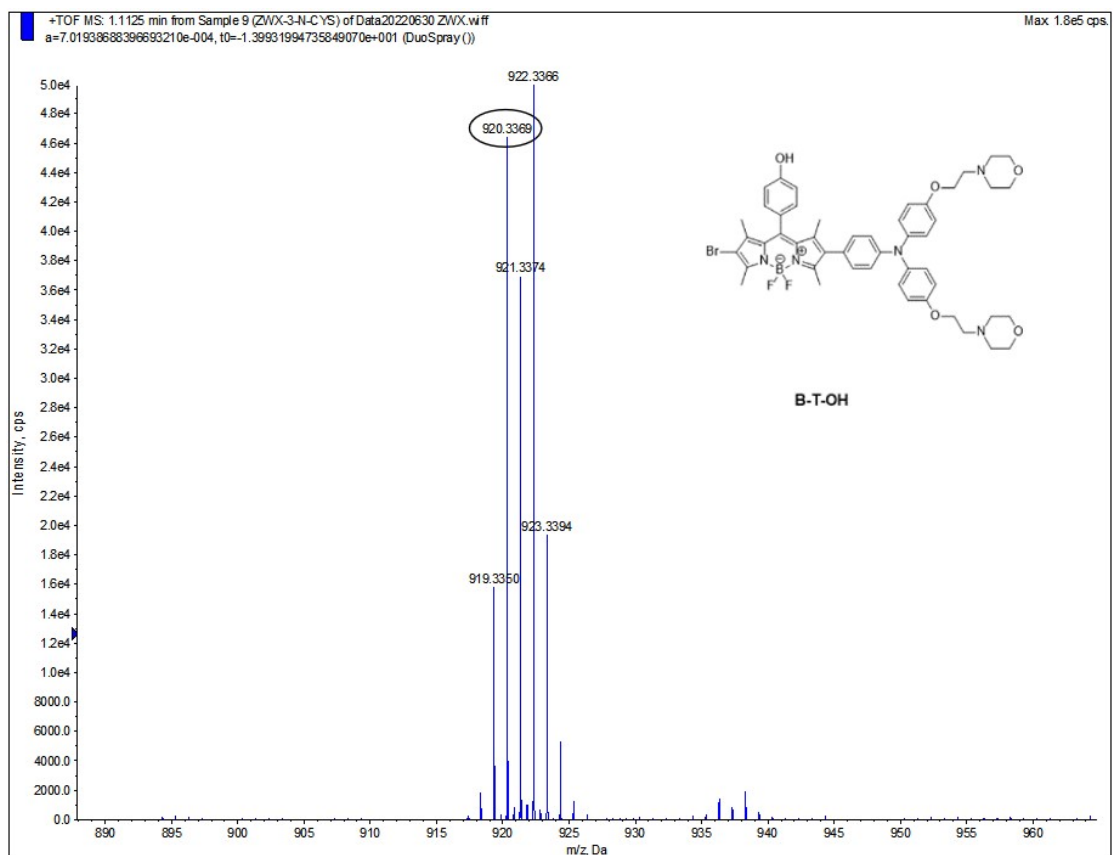

**Fig. S15.** HR-MS of NBD-B-T + Cys.

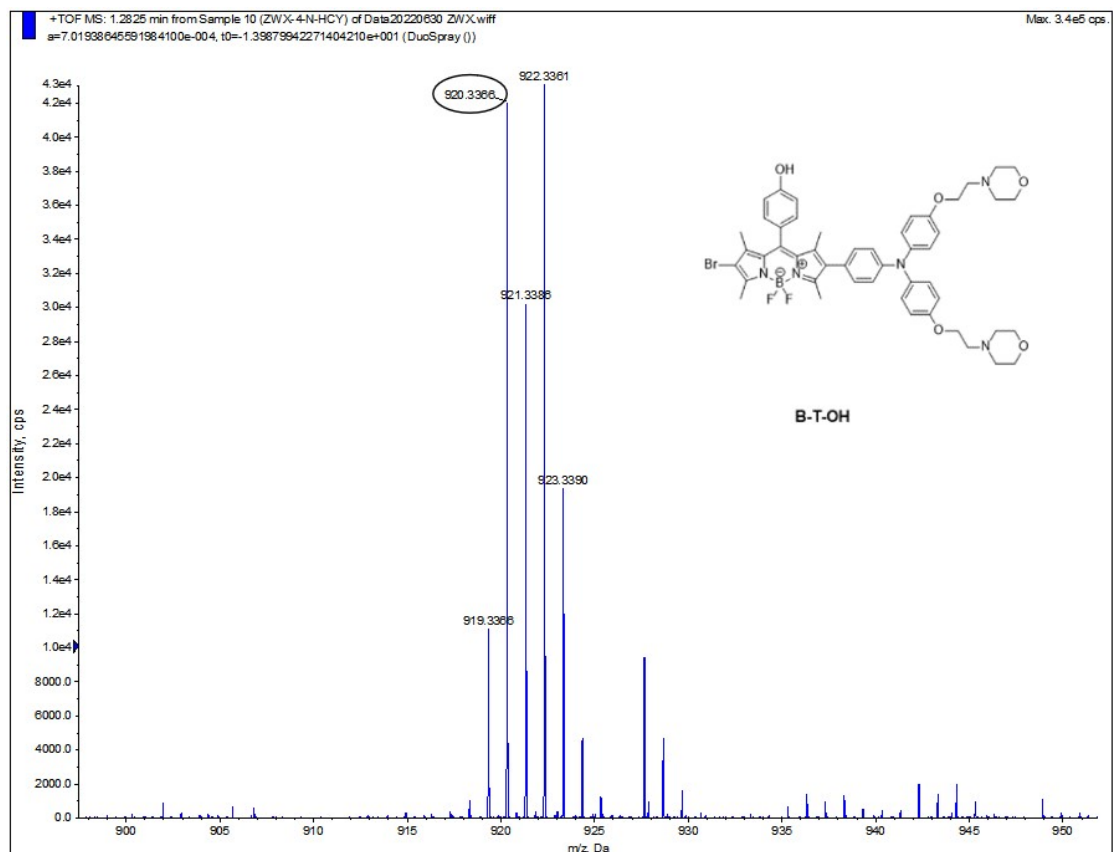

**Fig. S16.** HR-MS of NBD-B-T + Hcy.

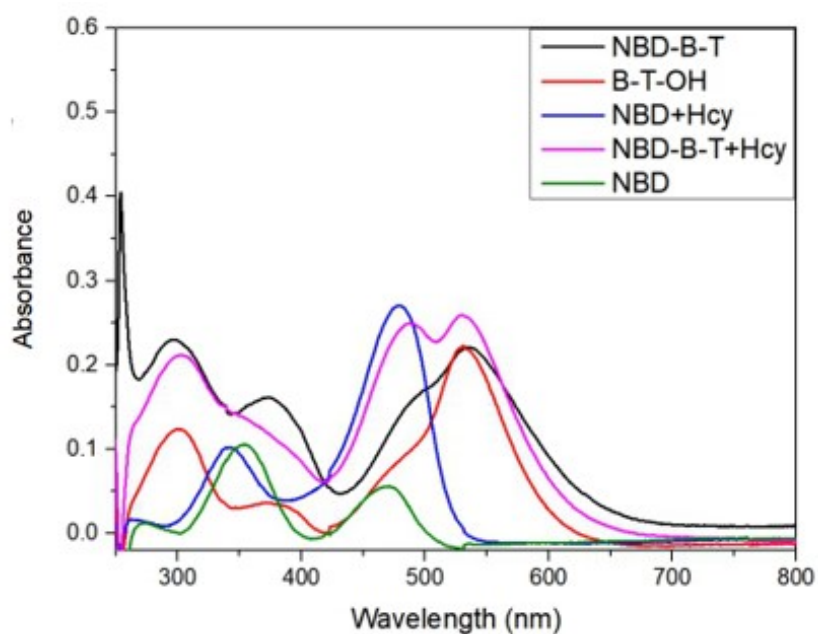

**Fig. S17.** Absorption spectra of probe NBD-B-T (10  $\mu\text{M}$ ), B-T-OH (10  $\mu\text{M}$ ), NBD-B-T (10  $\mu\text{M}$ ) +Hcy (500  $\mu\text{M}$ ), NBD (10  $\mu\text{M}$ ) +Hcy (500  $\mu\text{M}$ ) and NBD (10  $\mu\text{M}$ ) in DMF/PBS (v/v = 1/1, pH = 7.4).

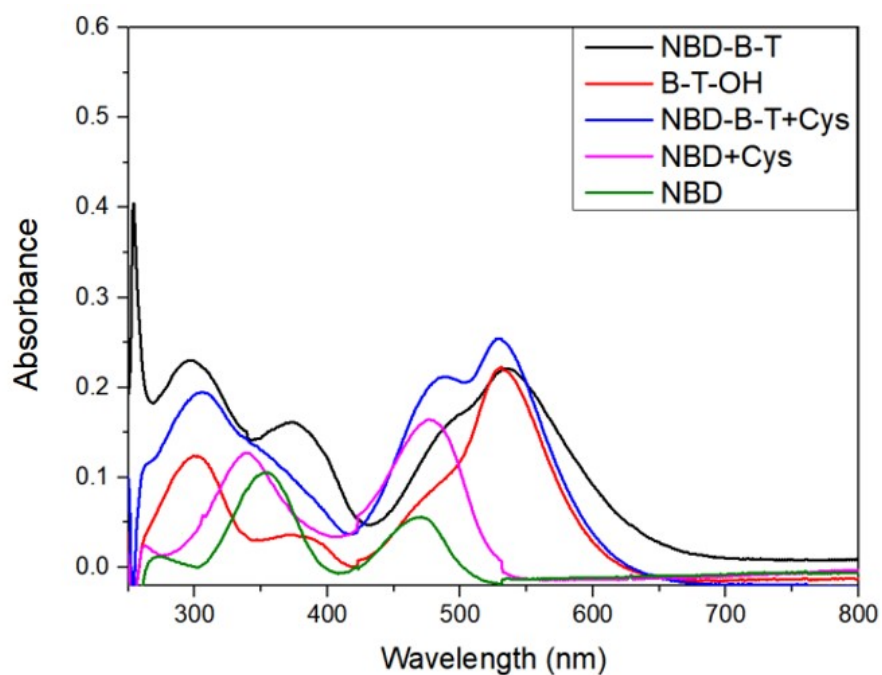

**Fig. S18.** Absorption spectra of probe NBD-B-T (10  $\mu\text{M}$ ), B-T-OH (10  $\mu\text{M}$ ), NBD-B-T (10  $\mu\text{M}$ ) +Cys (500  $\mu\text{M}$ ), NBD (10  $\mu\text{M}$ ) +Cys (500  $\mu\text{M}$ ) and NBD (10  $\mu\text{M}$ ) in DMF/PBS (v/v = 1/1, pH = 7.4).

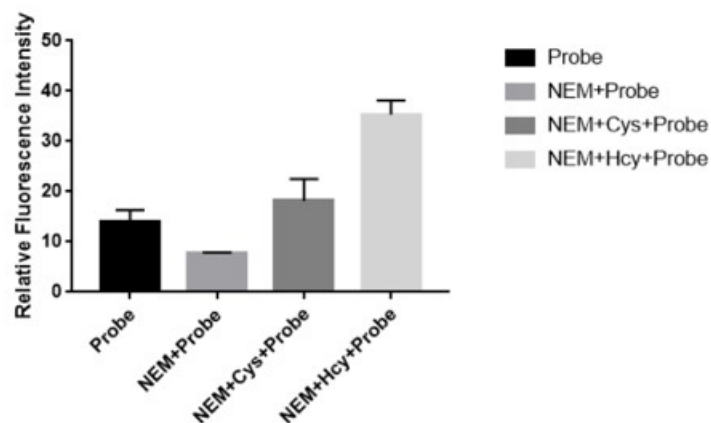

**Fig. S19.** Relative fluorescence intensity of Fig. 9a2-9d2.

#### References:

1. Wei, L. F.; Thirumalaivasan, N.; Liao, Y. C.; Wu, S. P. Fluorescent coumarin-based probe for cysteine and homocysteine with live cell application. *Spectrochim Acta A Mol Biomol Spectrosc* 2017, 183, 204-208.
2. Zhang, S.; Liao, W.; Wang, X.; Wang, X.; Wang, T.; Yuan, Y.; Chen, G.; Jia, X. An indanone-based fluorescent probe for detection and imaging of Cys/Hcy in living cells. *Spectrochim Acta A Mol Biomol Spectrosc* 2022, 279, 121364.
3. Zeng, S. M.; Zhang, Q.; Li, Q.; Yuan, L. C.; Abbas, M.; He, Z. X.; Zhu, H. L.; Wang, Z. C. A novel quinoline-based fluorescent probe for real-time monitoring of Cys in glioma. *Analyst* 2022, 147, 4257-4265.
4. Tang, L.; Shi, J.; Huang, Z.; Yan, X.; Zhang, Q.; Zhong, K.; Hou, S.; Bian, Y. An ESIPT-based fluorescent probe for selective detection of homocysteine and its application in live-cell imaging. *Tetrahedron Letters* 2016, 57, 5227-5231.
5. Zhong, K.; Zhou, S.; Yan, X.; Hou, S.; Li, X.; Tang, L. A novel D- $\pi$ -A type NBD-based fluorescent probe for ultrafast and distinguishable detection of Hcy/Cys and its bioimaging application. *J Lumin* 2020, 224, 117330.
6. Lv, H.-M.; Jiang, Z.-K.; Wang, J.; Wang, T.; Zhang, X.-N.; Hu, Y.-M.; Ma, Y.-Y. A novel ratiometric AIE-based fluorescent probe for specific detection of Hcy/Cys and imaging of living cells in vivo. *New J Chem* 2021, 45, 19521-19530.
7. Tan, H.; Zou, Y.; Guo, J.; Chen, J.; Zhou, L. A simple lysosome-targeted fluorescent probe based on flavonoid for detection of cysteine in living cells. *Spectrochim Acta A Mol Biomol Spectrosc* 2022, 280, 121552.
